# Supplementary material
Source: PubMed Central journal article supplement (PMC2652349)
Supplement: NIHMS92953-supplement-8.pdf [file NIHMS92953-supplement-8.pdf]

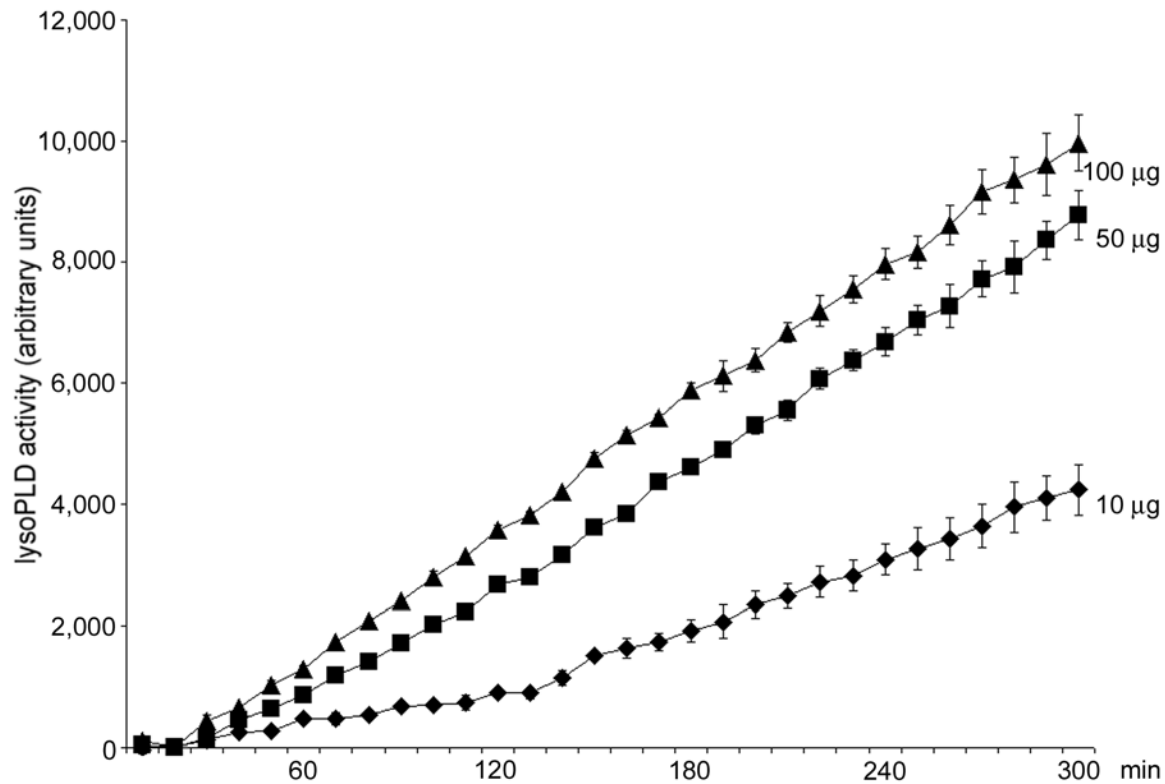

**Supplemental Fig. 1.** Time- and concentration-dependent measurement of PD-I $\alpha$ /ATX's lysoPLD activity. PD-I $\alpha$ /ATX's lysoPLD activity was determined in tissue culture supernatants from O4 immunopanned oligodendrocytes (4 days after plating) using the fluorogenic assay described by Ferguson et al. (2006). Means  $\pm$  SEM of a typical experiment done in triplicates is shown. Numbers on the Y-axis represent fluorescence increase as a measure for lysoPLD activity in arbitrary units.  $\mu$ g values represent amounts of input protein.
